# Supplementary material for: The value of ultra-detailed survey data for an improved flood damage modelling with explicit input data uncertainty treatment: INSYDE 2.0
Source: Copernicus journal article supplement (doi:10.5194/nhess-2023-179), 2023-11-03
Supplement: Supplementary file [file nhess-2023-179-AC1-supplement.pdf]

We would like to thank the Reviewer for his interest in our work and for carefully reading our manuscript; we greatly appreciate the insightful comments as they contribute to increase the manuscript robustness and, in general, to improve its quality. In the following, we provide a point-by-point reply to the general and specific comments raised.

---

## REVIEWER 1

### Summary

The manuscript “The value of ultra-detailed survey data for an improved flood damage modelling with explicit input data uncertainty treatment: INSYDE 2.0” proposes a tailored flood impact modeling framework INSYDE to account for the lack of information/uncertainty with regards to the required micro-scale vulnerability and exposure characteristics of buildings. In this study, the framework and process of data-preparation are discussed alongside three test cases to show the benefits.

The authors have done a good job. The authors are addressing a very relevant need for better fit tools to support decision-making acknowledging uncertainty. The authors offer a comprehensive idea how to deal with limited knowledge and give insights into the sensitivities. The manuscript is generally well written and makes particular good use of Tables. The overall structure of the manuscript could be improved alongside revising some of the figures and reflecting on their use. Strengthening the discussion of the benefits and learnings for a decision-maker from using INSYDE 2.0 compared to other models, could make this manuscript a very strong and relevant addition to the scientific community.

### General comments

**R1.C1.** The authors do a great job in justifying the two research questions to explore in this study. While this reviewer can clearly identify the evidence presented to answer the second research question. However, the first question on arguing the added value in terms of output quality and usefulness seems to be addressed marginally and should receive more attention in the results and discussion section. What can decision-makers specifically learn from INSYDE 2.0? In that context, this reviewer observed that the Authors seem not to discuss any limitations of this approach.

**Reply:** The primary lesson learned from INSYDE 2.0 lies in transcending the confines of deterministic damage models. By challenging the conventional notion of certainty in damage estimations, our approach aims at highlighting the importance of recognizing uncertainty and the idea, from a decision-maker perspective, that the band of uncertainty can often be more informative than a singular point estimate (which should not be regarded as definitive “truth”, but subject to uncertainty). In our paper we also challenge the conventional use of the term “validation” in the context of flood damage models. Acknowledging the complex interplay of assumptions in both model input and output, we refrain from embracing the term “validation” as it may imply a level of certainty that is inherently elusive. Our approach, considering the uncertainties in input data and recognizing possible biases in observed damage, shifts from just seeking convergence between estimations and observations to embracing a comprehensive understanding of the uncertainties that characterize flood damage estimations.

Inherent to the multivariable nature of the model, INSYDE 2.0 demands a wealth of detailed, locally dependent input data. This characteristic, while enhancing the model’s granularity, simultaneously presents a challenge in data acquisition. Acknowledging this limitation is crucial for a transparent interpretation of the results and emphasizes the necessity for robust, context-specific datasets. Although these points have been already raised in the original manuscript, we will ensure to enrich the results and discussion section with a more elaborate exposition on the added value and lessons derived from INSYDE 2.0, as well as with a comprehensive discussion on the inherent limitation.

**R1.C2.** Line 95: This reviewer thinks that the description of the methodological approach could benefit from improved visualization and explanation as well as restructuring the sections. Figure 1 seems complete but complex. The reviewer cannot recognize the elements mentioned in the figure in the accompanying text (or the subsequent subsection titles). This makes it very difficult to follow. Using more descriptive subsection titles aligned with the steps in an (updated?) Figure 1 could avoid this challenge. If others were to use INSYDE 2.0, would they use this methodological approach as well? If so, making a clear distinction between describing INSYDE 2.0, Preparing data for INSYDE 2.0 and Applying INSYDE 2.0 could be beneficial in the method section.

**Reply:** To enhance the understanding of our approach, we will revise Figure 1 to better align with the accompanying text and make it more comprehensible. This will involve providing a clearer visual representation of the different steps involved in INSYDE 2.0 and introducing more descriptive subsection titles that align closely with the steps illustrated in Figure 1.

**R1.C3.** This reviewer is wondering whether the title (particularly: 'The value of ultra-detailed survey data') of this manuscript captures the main purpose of this study. Firstly, because the data-sources discussed in this paper are not limited to survey data. Secondly, the paper mostly focuses on exploring the effects of uncertainty.

**Reply:** We agree with the Reviewer that our manuscript includes a broader range of data sources beyond survey data. To accurately reflect the diversity of data employed in our study, we will modify the first part of the title to “The value of multi-source data”, while we believe the second part of the current title effectively communicates the focus around exploring the impacts of uncertainty in flood damage modelling. Then, the new proposed version of the title will be the following: “The value of multi-source data for an improved flood damage modelling with explicit uncertainty treatment: INSYDE 2.0”

### Specific comments

**R1.C4.** Line 23: these references seem outdated to confirm the Author’s claim regarding development and remaining limitations of flood risk modelling over the past decade.

**Reply:** In the revised version of the manuscript, we will incorporate more recent references (including Wagenaar et al. (2016) (already present in the reference list of the original manuscript), Winter et al. (2018) and Marvi (2020)) to provide a current and comprehensive overview on current limitations of flood risk modelling.

*Winter, B., Schneeberger, K., Huttenlau, M. and Stötter, J.: Sources of uncertainty in a probabilistic flood risk model. Nat Hazards 91, 431-446 (2018). doi: 10.1007/s11069-017-3135-5.*

*Marvi, M.T. A review of flood damage analysis for a building structure and contents. Nat Hazards, 102(3), 967-995. (2020). doi: 10.1007/s11069-020-03941-w.*

**R1.C5.** Line 103 – Line 106: What benefits did the Authors see in using data from a specific region to explore the sensitivities of the impacts/feature importance? Would the findings from a sensitivity analysis not offer similar insights, perhaps even more generalizable?

**Reply:** The rationale for our approach is rooted in the need for context-specific insights into flood damage assessment. By analyzing a specific region, it is possible to identify the input variables that have the most significant impact on damage assessment in that particular context. This region-specific understanding is crucial for guiding efficient data retrieval efforts, as it allows to prioritize the collection of information on variables that really play a key role in the given region (i.e., issue of transferability of damage models, which should be considered as “local” models).

In our analysis, we therefore performed a sensitivity analysis for two different scenarios to provide a comprehensive perspective. The first involved an analysis tailored to the area under investigation, with typical ranges of values calibrated based on observed data for the Po River region. This allowed us to discern the most important variables for damage estimation in the specific context (top panel of the original Figure 4). The second scenario considered a non-region-specific case, encompassing a broader range of values for the input variables, to examine general sensitivities of damage (bottom panel of the original Figure 4).

We believe that this dual approach provides both essential insights for effective and efficient damage modelling at the regional level and broader, more generalizable findings on damage mechanisms.

**R1.C6.** Line 108 – Line 119: Did the authors generate the EDF’s? How many data points were available for fitting the distributions mentioned in Tab.1 and Tab.2 ? Since this study is addressing effects of uncertainty, it would be interesting to know on what basis these distributions are developed . This reviewer thinks it could be a good idea to add these EDF’s + fits in the Supplemental Material.

**Reply:** As mentioned in the original manuscript, details on data statistics at the base of derived empirical distributions are available in the work by Huayra Mena (2022), which reports detailed information on building inventory, virtual surveys and flood-related data.

Due to the public nature of the mentioned document, we cannot reproduce the same information here (i.e., possible plagiarism issue), but we will enhance the description of the data sources in the revised version of the manuscript to provide more details on the data sources from which we derived the empirical distributions.

**R1.C7.** Line 120: How were different return periods included in the EDF’s?

**Reply:** The available hazard maps for the Po River included information on three different return periods. However, for the derivation of the EDFs, our focus was specifically on the most representative medium-frequency scenario (i.e., typical design scenario for the implementation of mitigation measures in the Po catchment). We will ensure to clarify this aspect in the revised version of the manuscript.

**R1.C8.** Meanwhile the current text in section 2.3 is interesting and probably relevant for the functioning of the model, this reviewer does not see the direct link between the purpose of this study (include uncertainty into INSYDE) with this fix addressing the scalability problem. Since this bias seems to be mentioned in 2.1 (line 83), this reviewer would suggest to mention the change of the model in 2.1 and/or put the detailed elaboration in the Supplementary Material. Given that the change already had been applied when using INSYDE in Belgium, this seems not innovative or relevant to report here. Instead, this reviewer was expecting an elaboration of the statement in line 100 elaborating on the process of translating mixed source data into distributions or required adjustments to the (existing) probabilistic framework.

**Reply:** Following Reviewer's suggestion, we will merge section 2.3 into section 2.1. Furthermore, as also pointed out in reply to R1.C6, in the revised version of the manuscript we will include more details on the data sources used for the derivation of the empirical distributions.

**R1.C9.** Line 148 – line 150: Why did the authors choose to build one dataset containing two different flood types (riverine and flash floods)? Would it not be more accurate to have two separate ones, one per flood type?

**Reply:** The rationale behind constructing a dataset encompassing both riverine and flash floods was to establish a single model for the entire Po district, aligning with exposure and vulnerability characteristics applicable to the whole region (i.e., although different areas within the district may encounter distinct flood types, the overall exposure and vulnerability features are the same for the entire region).

Furthermore, it is important to note that the fundamental feature of INSYDE, as a local model, is flexibility. Users can indeed modify and fine-tune information related to flood features and building characteristics as per their specific needs and preferences. This adaptability ensures the applicability of the model to diverse scenarios. We will ensure to elaborate on this aspect for better clarity in the revised manuscript.

**R1.C10.** Line 152: These distributions are generated based on the Po river modelling exercise only? Or also for the two historic case studies separately?

**Reply:** The generated distributions are applicable to the two historic cases, both situated within the Po plain. However, for these specific flood events, detailed information on water depth and flow velocity at the building location and a rough estimate of flood duration were available (see Table 3 in the original manuscript) and it was not required a sampling from the elaborated distribution (except for the sediment variable).

**R1.C11.** Line 155 – Line 163: The study would benefit from additional elaboration how these correlations are built. This reviewer can understand why authors built a synthetic correlation between inundation depth and duration (does it work differently for riverine floods and flash floods?), but much less with regards to the flow speed and flood duration. Can the Authors elaborate on these decisions? How accurate was the fitting of the correlation function based on the sample values? In case of the Po river modelling, flow depth and flow velocity were modelled and thus directly correlated already? What does  $d / \max(d)$  stand for? Why did the Authors not use Copulas to account for joint probabilities?

**Reply:** For the analyzed area, while we had information for deriving distributions for water depth and flow velocity, the same cannot be said for sediment and duration. Therefore, as already stated in the original manuscript, synthetic correlations were established among the hazard variables, adopting an expert-based, physically inspired approach to represent different flow types. For instance, high flow velocity is considered to be related with increased sediment-carrying capability, as opposed to long-lasting riverine floods that typically carry fine-graded sediments. These patterns are translated into the functional forms presented in L156-158 of the original paper and graphically shown in Figure 2. The expression  $d / \max(d)$  is employed to prevent the occurrence of negative velocity values. As for copulas, while they may be useful for modelling joint probabilities, the simplicity of our synthetic correlations, guided by physical principles, was deemed sufficient for our purposes.

**R1.C12.** Line 163 – Line 165: This is not clear. It seems that  $h_e$  and  $v$  are the leading parameters and  $d$ ,  $s$ ,  $q$  are depending on these parameters. Why do we lose information? And what can this reviewer picture under “[...] the values of  $d^*$ ,  $v^*$  and  $s^*$  were then replaced with the correspondent percentiles from the datasets of  $d$ ,  $v$  and  $s$ ”? What is the effect of this?

**Reply:** In the revised version of the manuscript we will modify L152-165 of the original manuscript by better explaining the procedure. The revised text will be as follows:

“More in detail, probability distributions were first retrieved independently for the hazard variables based on detailed data when available ( $h_e$ ,  $v$ ) or upon expert-based assumptions derived from aggregated or approximated data ( $d$ ,  $s$ ,  $q$ ), and used to sample sets of 250.000 elements; furthermore, the following functional dependencies were assumed to describe the correlation among the features, based on the values sampled for  $h_e$ ,  $d$  and  $v$ :

$$d^* = c_1 + c_2 \cdot \sqrt{h_e} \cdot N(\mu = 1, \sigma = 0.2)$$

$$v^* = c_3 - d/\max(d) \cdot N(\mu = 1, \sigma = c_3 - d/\max(d))$$

$$s^* = c_4 + c_5 \cdot \sqrt{v} \cdot N(\mu = 1, \sigma = 0.2)$$

with  $N$  being a random number from a normal distribution with mean  $\mu$  and standard deviation  $\sigma$ , while the coefficients  $c_i$  are constant values introduced in the expert-based approach to obtain the desired functional relationships among the variables.  $q$  was instead assumed independent from the other hazard features.

Although the resulting  $d^*$ ,  $v^*$  and  $s^*$  account for the correlation among the hazard variables, they do not follow the probability distributions retrieved independently for the variables  $d$ ,  $v$  and  $s$ ; on the contrary, the latter were sampled independently from the correct distributions but they do not provide information on the rank correlation among the variables.

To obtain a dataset with both the mentioned properties, the values of  $d^*$ ,  $v^*$  and  $s^*$  were then ranked and replaced with the corresponding percentiles derived from the ordered versions of  $d$ ,  $v$  and  $s$ .”

**R1.C13.** Line 174: How did the authors end up with the number of 5000 hypothetical buildings? Did the authors explore the convergence behavior? When looking into uncertainty and Monte Carlo sampling justification of such choices should be provided.

**Reply:** In the revised version of the manuscript we will specify that the choice of 5000 hypothetical buildings was determined by the need to ensure a trade-off between the robustness of the results and computational efficiency. It is also important to note that within our methodological framework, we run 1000 replicates for each generated building, resulting in a total of  $5 \cdot 10^6$  runs for damage estimations.

**R1.C14.** Line 179: In the results, readers are presented with the damage difference as the metric to explore the feature importance. Information on how this metric is calculated (e.g. aggregated vs averaged over the 5000 buildings) would clarify how to read the results.

**Reply:** As presented in the original manuscript (L173-180), the metric used for the feature importance is obtained through a probabilistic test on a subset of 5000 hypothetically flooded buildings sampled from the generated synthetic dataset. Initially, we use INSYDE 2.0 to estimate damage on the complete dataset, assuming all input values are available, establishing a reference point. Subsequently, for each of the 5000 buildings, we systematically remove one input variable at a time, sampling the corresponding missing values from the synthetic dataset. This process is repeated for each variable, and each time, damage is recalculated. The absolute difference in damage compared to the reference value is then recorded, allowing us to determine the variance induced by each feature on model outcome. Hence, the boxplots in Figure 4 depict the range of damage differences observed across the 5000 tested buildings for each examined missing variable. The representation of data variability by means of boxplot is a standard representation and, in our opinion, do not deserve further explanations in addition to the procedural description already provided in the original manuscript.

**R1.C15.** Line 195: per house 1000 replicates were generated to account for uncertain combination of  $\sim 20$  parameters. Did the authors explore the convergence behavior of the results to confirm that this choice is reliable (see comment regarding line 174)?

**Reply:** See response to comment R1.C13.

**R1.C16.** Line 215 – Line 220: Here the Authors mention INSYDE and its benefits. Showcasing the utility of INSYDE 2.0 would not only be towards a decision-maker but also towards the previous version INSYDE. It would be interesting to see the results of the old INSYDE alongside INSYDE 2.0.

**Reply:** The evolution of INSYDE from its original version has been marked by ongoing enhancements, refinements and applications. Results for the two case studies with the older INSYDE versions, which utilized fixed default values in the case of missing inputs, have been extensively presented in prior works (Dottori et

al., 2016 - Caldugno case; Amadio et al., 2019 - Caldugno and Lodi cases; Molinari et al., 2020 - Lodi case), in which modelling outcomes have been compared against observed damage. In the revised version of the manuscript, we will provide more detailed reference and discussion to these results. Instead, the central point of the present study lies not only in showcasing the incremental improvements from one INSYDE version to another but, more importantly, in underlining the critical awareness of the influence of uncertainties stemming from unknown input data in model applications. While the different versions of INSYDE could certainly be informative, our primary emphasis here is on the broader message, i.e. on the significance of acknowledging uncertainties in the modelling process. This awareness stands as a substantial added value, crucial for both the modeler and the decision-maker, surpassing any potentially misleading sense of certainty derived from a deterministic application of (any) model.

**R1.C17.** Line 220: Table 3 is very helpful. This reviewer would suggest to add the details regarding the synthetic case study in that table as well for overview purposes.

**Reply:** In the synthetic case study with the reduction in the dataset's level of completeness, with the exception of FA and he, all other input variables were assumed to be possibly unknown and, therefore, we think that providing additional details in Table 3 might not be meaningful. Comprehensive information regarding this aspect is instead already available in Section 2.5.2.1 of the original manuscript.

**R1.C18.** Line 224: The benefit of section 3.1 is not clear to this reviewer. It seems to focus on the pairwise occurrence of parameters. It is unclear how it offers evidence to answer the initially proposed research questions. This reviewer thus suggests to either incorporate it in the methodology section or place it in the Supplemental Material. For this reviewer, pairwise occurrence is just one of the different elements in the data sampling process. For example, the pairwise occurrence in the collected information used for the sampling might be of additional interest (to gain insight into uncertainty progression). At the same time, Figures 2 and 3 seem to have an incorrect design: the subplots on the diagonal seem to be histograms, but the y-axis labels are not correct.

**Reply:** Section 3.1 visually represents the identified distributions and the pairwise dependencies among the variables, as outlined in Tables 1 and 2 (please refer to the original Section 2.4, L147-164). While we may understand the suggestion to relocate it, these graphical representations serve as informative and explicative visualizations of the methodological approach for the generation of the synthetic dataset, which is used in the downstream applications presented in the next sections of the paper.

We will instead amend Figures 2 and 3 by correcting the y-axis for the plots on the diagonal (density plots) and simplifying the figures by displaying only the lower diagonal part of the pairplot (symmetrical matrix).

**R1.C19.** Line 253: Here, an extended dataset is mentioned the first time (Elaboration in the Method section needed!). So authors are using 4 case studies? In general, what is the justification for the three different cases? What added benefit do the authors see by adding a second stylized case here?

**Reply:** We introduced a case based on an extended synthetic dataset with a broader range of variability for the input variables in order to offer insights into general damage sensitivities to input variables beyond the specific case of northern Italy (see also reply to comment R1.C5). While the regional case highlights the crucial variables for efficient damage modelling in the area under investigation, the more general case provides broader information on the influence of different variables on estimated damage. This clarification, along with the related adjustment in the methodological section, will be incorporated into the revised manuscript.

**R1.C20.** Figure 4: How is the damage difference calculated? The medians are barely visible. In general this figure is very colorful, while some other elements are not visible (whiskers, box whiskers for LM to YY in upper plot). The bars seem to go beyond the chosen y-axis limits on some occasions, e.g for BE (upper plot).

**Reply:** The method for calculating the (absolute - this will be clarified in the updated version of the manuscript) damage difference, serving as the metric for the feature importance, is described in detail in Section 2.5.1 of the original manuscript (see also our response to Comment R1.C14). We will implement improvements to Figure 4, ensuring better visibility of crucial elements. However, we highlight that the y-axis origin is set at 10€ to neglect not significant damage differences, while maintaining figure readability.

**R1.C21.** Line 260: how do the correlations between  $h$ ,  $d$ ,  $v$ , and  $s$  play into these results?

**Reply:** The correlations established between the hazard parameters are crucial for generating representative and meaningful data. Without these correlations, there would be a risk of generating "non-physical" data, resulting in unrealistic scenarios (e.g., associating a 0.01 cm inundation depth with a 48-hour duration), which would significantly impact the accuracy and representativeness of damage estimation. As a consequence, the

variability in the damage difference is reduced, since we are removing the effect of such “non-physical” input combinations.

**R1.C22.** Line 261: 10,000 EUR per house or averaged across the entire set of buildings? Are these higher damages or lower damages? A permutation of only 10,000 EUR for each house would lead to a difference of up to 5 million EUR, which is significant again? What are the uncertainty bounds for this difference?

**Reply:** The value of 10,000 € represents the median of the absolute damage difference calculated across the 5000 hypothetically flooded buildings and the boxplot in Figure 4 directly shows the uncertainty bounds associated with the damage differences (see also reply to comments R1.C14 and C20.). In the revised version of the manuscript, we will change the y-axis label into “Absolute damage difference [€]” to enhance clarity of the figure.

While the amount of 10,000 € may seem high, it is not surprising since it is associated with (possible lack of) information on inundation depth. If, for a particular building, there is no available information on inundation depth, the model must sample a value, which can be very different from the one for which the reference damage has been calculated. This effect is more pronounced in the extended dataset scenario, where a broader range of values is possible for water depth, resulting in larger damage differences.

However, it should be recognized that in practical applications of damage assessment, inundation depth is a mandatory and usually known variable (or at least known within certain limited uncertainty). This is because an inundation scenario must be defined. As a result, the uncertainty associated with this variable is more effectively constrained within narrower bounds compared to scenarios where inundation depth is randomly sampled (which would mean performing a damage assessment for an unknown inundation scenario).

**R1.C23.** Figure 5: The left plot is very useful and clear to see. Why did the Authors choose to combine the scatter plots for the other BT’s?

**Reply:** The decision to combine the scatter plots for the other BTs in Figure 5 was guided by the similarity in the patterns among BTs, allowing for an efficient visualization; the use of distinct colors for each BT facilitates the clear identification of individual patterns, while the subdivision into a separate plot for the apartment type was necessitated by the different scale of the y-axis for this BT.

**R1.C24.** Figure 7: While Table 4 is very helpful and supports the reasoning in the text, this reviewer has doubts regarding Figure 7. First of all, the use of log-log scales makes it very difficult to interpret the results since distance is not constant at different positions in the figure. As such, diverging from the diagonal has much more severe implications towards increasing Observed Damages. Secondly, this reviewer is wondering whether making use of the damage difference as in previous figures might be more informative and supportive regarding the research questions. What is a decision-maker learning from this visualization about uncertainty in modelling?

**Reply:** The use of log-log scales was intentional to allow a better visualization of the full range of data, otherwise the lower values would have appeared as collapsed to a single region. In addition, we prefer to maintain the representation of results in terms of observed vs calculated damages (and not in terms of damage difference), as conventional in validation exercises.

According to us, the visualization of error bars is crucial for decision-makers, providing insights into the associated uncertainties in a damage model. This aligns with our broader goal of emphasizing the importance of acknowledging and addressing modelling uncertainties, avoiding the potential pitfalls of deterministic estimations that might give a misleading sense of certainty. Furthermore, the visualization of uncertainty, seldom provided in usual “validation” exercises of damage models in the literature, adds value to our proposed approach.

**R1.C25.** Table 4: What is the computed expected damage? Other point: As a decision-maker, a conclusion I would draw from this Table is that Lodi and Caldogno are both cities that are on average much more vulnerable (because of building properties) than other cities in Northern Italy. Or that INSYDE underestimates damages. Can a decision-maker get any insights into how much of the model gap with reality can be attributed to the uncertain input data vs. other sources of uncertainty/error (e.g. the hazard-damage relations of the model). What lessons can a decision-maker learn from this? Elaborating a bit more on this could benefit the significance of this work.

**Reply:** Theoretically, the computed expected damage for each building would be the average of the damage outputs for an infinite number of runs. In our opinion, from a decision-makers’ perspective, the entire range of damage variability (Table 4) is more informative than a single value.

It appears that the comment from the Reviewer originates from the assumption that “observed damage” represent an absolute truth. Indeed, as highlighted in a Molinari et al. (2020), observed damage does not always fully capture the reality, being subject to various biases. This is also the reason why we prefer to avoid the use of the word “validation”. Consequently, drawing concrete conclusions about model’s underestimation or overestimation becomes challenging. Instead, from a decision-maker’s perspective, the key message would be about the transparency on the uncertainty in the damage estimation. Rather than focusing on a single value like the expected damage, decision-makers should be aware of the broad variability of model outcomes stemming from limited knowledge on certain inputs. To make well-informed decisions, a comprehensive understanding of modelling limitations and assumption is essential. This consideration was already present in the original manuscript, but we will further emphasize it in the revised version of the discussion section.

**R1.C26.** Line 350-352: This reviewer has not seen any evidence that confirms this claim. The advantage can only be compared to the original INSYDE set up, or the learnings of analysing the uncertainty bands.

**Reply:** The evidence supporting the claim is present in Table 4, where observed damage consistently falls within the 50<sup>th</sup> and 75<sup>th</sup> percentiles of calculated damage for both case studies (always considering that also observed damages are highly uncertainty, as discussed in previous comments). Additionally, to provide a more comprehensive view, we will include reference and discussion from previous studies that report “validation results” for the two case studies using earlier versions of INSYDE. See also reply to comment R1.C25.
